# Supplementary material for: “Tuning fork”-shaped mesogens: large hysteresis in the interdigitated layer structure in the liquid crystal phases
Source: Royal Society of Chemistry journal article supplement (doi:10.1039/b406177b), 2004-01-01
Supplement: b406177b.doc [file b406177b.doc]

Electronic Supplementary Information-B406177B


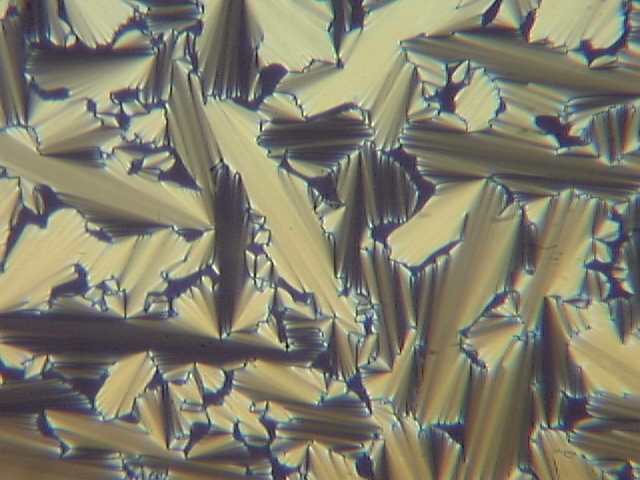


**Fig. 1 (colour version)** A polarized optical micrograph of **1e**. Fan-shaped textures at 114oC on cooling (×400). The directions of the crossed polarizers are indicated by the arrows. The dark lines are parallel to the directions.

The analytical data of 1c-1i.

**1a**, and **1e** were reported in our previous paper. (*Chem. Mater.* 2001, **13**, 2468.)

**1c**: yield 52.6%; white solid (methanol-ethyl acetate); /cm-1(KBr) 2920, 1738, 1689, 1654, 1605, 1511, 1469, 1259, 1168, 758; δH (500MHz, CDCl3, TMS) 0.88 (t, 6H, *J* = 7.0Hz), 0.99 (t, 3H, *J* = 7.4Hz), 1.27-1.38 (m, 32H), 1.46 (t, 6H, *J* = 7.6Hz), 1.82 (t, 6H, *J* = 6.6Hz), 4.02 (t, 6H, *J* = 6.6Hz), 6.98 (d, 4H, *J* = 8.9Hz), 7.12 (d, 4H, *J* = 8.3Hz), 7.35 (d, 4H, *J* = 8.6Hz), 7.54 (d, 4H, *J* = 8.3Hz), 8.14 (d, 4H, *J* = 8.9Hz), 8.22 (d, 4H, *J* = 8.6Hz); δC (125.65 MHz, CDCl3, TMS) 13.80, 14.12, 20.37, 22.69, 25.99, 29.10, 29.36, 29.56, 29.60, 29.65, 29.66, 31.18, 31.93, 47.42, 68.31, 68.42, 114.45, 120.92, 121.83, 122.20, 126.41, 130.26, 131.87, 132.45, 134.30, 153.55, 155.60, 163.67, 163.89, 164.31, 173.43; Elemental analysis found: C% 73.87% H% 7.62, N% 1.16, calcd for C70H83NO12 (＋0.5H2O): C% 73.79, H% 7.43, N% 1.23.

**1d**: yield 95.7%; white solid (methanol-ethyl acetate); /cm-1(KBr) 2920, 1735, 1650, 1605, 1265, 1175, 760; δH (500MHz, CDCl3, TMS) 0.87 (t, 3H, *J* = 7.0Hz), 0.98 (t, 6H, *J* = 7.0Hz), 1.27-1.54 (m, 14H), 1.80 (t, 6H, *J* = 6.7Hz), 4.04 (t, 6H, *J* = 6.7Hz), 6.96 (d, 4H, *J* = 8.6Hz), 7.11 (d, 4H, *J* = 8.3Hz), 7.33 (d, 4H, *J* = 8.6Hz), 7.53 (d, 4H, *J* = 8.6Hz), 8.12 (d, 4H, *J* = 8.9Hz), 8.20 (d, 4H, *J* = 8.9Hz); δC (125.65 MHz, CDCl3, TMS) 13.77, 14.07, 19.15, 22.60, 27.05, 29.01, 29.14, 29.22, 30.29, 31.08, 31.77, 47.63, 68.04, 114.40, 120.88, 121.77, 122.14, 126.35, 130.23, 131.82, 132.39, 134.26, 153.49, 155.55, 163.60, 163.83, 164.24, 173.35; Elemental analysis found: C% 72.40, H% 6.16, N% 1.39, calcd for C58H59NO12: C% 72.41, H% 6.18, N% 1.46.

**1f**: yield 72.9%; white solid (methanol-ethyl acetate); /cm-1(KBr) 2923, 1740, 1690, 1654, 1605, 1512, 1469, 1268, 1167, 757; δH (500MHz, CDCl3, TMS) 0.88 (t, 6H, *J* = 7.0Hz), 0.89 (t, 3H, *J* = 7.4Hz), 1.27-1.50 (m, 46H), 1.82 (t, 6H, *J* = 7.1Hz), 4.04 (t, 6H, *J* = 7.1Hz), 6.98 (d, 4H, *J* = 9.2Hz), 7.12 (d, 4H, *J* = 8.9Hz), 7.35 (d, 4H, *J* = 8.9Hz), 7.54 (d, 4H, *J* = 8.9Hz), 8.14 (d, 4H, *J* = 9.2Hz), 8.22 (d, 4H, *J* = 8.9Hz); δC (125.65 MHz, CDCl3, TMS) 14.12, 22.65, 22.69, 25.99, 27.10, 29.09, 29.19, 29.27, 29.36, 29.56, 29.60, 29.65, 29.66, 31.82, 31.92, 68.43, 114.45, 120.92, 121.82, 122.18, 126.41, 130.25, 131.87, 132.44, 134.31, 153.55, 155.60, 163.66, 163.89, 164.30, 173.40; Elemental analysis found: C% 74.83, H% 7.64, N% 1.11, calcd for C74H91NO12: C% 74.91, H% 7.73, N% 1.18.

**1g**: yield 82.4%; white solid (methanol-ethyl acetate); /cm-1(KBr) 2931, 1734, 1649, 1604, 1510, 1467, 1273, 1165, 762; δH (500MHz, CDCl3, TMS) 0.88 (t, 3H, *J* = 7.1Hz), 1.00 (q, 6H, *J* = 7.3Hz), 1.27-1.43 (m, 22H), 1.82 (t, 6H, *J* = 7.9Hz), 4.06 (t, 6H, *J* = 6.5Hz), 6.97 (d, 4H, *J* = 8.9Hz), 7.12 (d, 4H, *J* = 8.9Hz), 7.35 (d, 4H, *J* = 9.2Hz), 7.54 (d, 4H, *J* = 8.9Hz), 8.13 (d, 4H, *J* = 9.2Hz), 8.22 (d, 4H, *J* = 8.9Hz); δC (125.65 MHz, CDCl3, TMS) 13.81, 14.12, 19.21, 22.70, 27.11, 29.08, 29.32, 29.37, 29.54, 29.61, 29.65, 31.13, 31.94, 47.70, 68.11, 114.46, 120.95, 121.82, 122.20, 126.43, 130.25, 131.87, 132.45, 134.32, 153.56, 155.61, 163.67, 163.90, 164.30, 173.40; Elemental analysis found: C% 72.94, H% 6.39, N% 1.24, calcd for C62H67NO12: C% 73.14, H% 6.63, N% 1.38.

**1h**: yield 78.5%; white solid (methanol-ethyl acetate); /cm-1(KBr) 2925, 1735, 1690, 1651, 1604, 1511, 1469, 1268, 1165, 760; δH (500MHz, CDCl3, TMS) 0.88 (t, 3H, *J* = 7.1Hz), 0.90 (t, 6H, *J* = 7.0Hz), 1.27-1.43 (m, 32H), 1.46 (t, 6H, *J* = 7.4Hz), 1.83 (t, 6H, *J* = 7.5Hz), 4.05 (t, 6H, *J* = 6.7Hz), 6.98 (d, 4H, *J* = 8.9Hz), 7.12 (d, 4H, *J* = 8.6Hz), 7.35 (d, 4H, *J* = 8.8Hz), 7.54 (d, 4H, *J* = 8.9Hz), 8.14 (d, 4H, *J* = 9.2Hz), 8.22 (d, 4H, *J* = 8.8Hz); δC (125.65 MHz, CDCl3, TMS) 14.09, 14.12, 22.66, 22.70, 26.00, 27.11, 29.10, 29.23, 29.33, 29.37, 29.54, 29.61, 29.66, 31.81, 31.94, 68.44, 114.47, 120.94, 121.82, 122.19, 126.43, 130.26, 131.87, 132.45, 134.32, 153.56, 155.61, 163.66, 163.90, 164.30, 173.40; Elemental analysis found: C% 74.15, H% 7.20, N% 1.19, calcd for C70H83NO12: C% 74.38, H% 7.40, N% 1.24.

**1i**: yield 60.7%; white solid (methanol-ethyl acetate); /cm-1(KBr) 2923, 1742, 1650, 1605, 1510, 1468, 1272, 1164, 760; δH (500MHz, CDCl3, TMS) 0.89 (t, 9H, *J* = 7.0Hz), 1.27-1.50 (m, 54H), 1.83 (t, 6H, *J* = 6.9Hz), 4.05 (t, 6H, *J* = 6.9Hz), 6.98 (d, 4H, *J* = 8.6Hz), 7.12 (d, 4H, *J* = 8.6Hz), 7.35 (d, 4H, *J* = 8.6Hz), 7.54 (d, 4H, *J* = 8.2Hz), 8.13 (d, 4H, *J* = 8.9Hz), 8.22 (d, 4H, *J* = 8.6Hz); δC (125.65 MHz, CDCl3, TMS) 14.12, 14.35, 22.70, 25.99, 27.11, 29.10, 29.37, 29.57, 29.60, 29.67, 31.93, 68.45, 114.49, 120.80, 121.73, 122.16, 126.35, 130.26, 131.88, 132.47, 134.23, 153.50, 155.55, 163.58, 163.90, 164.24, 173.36; Elemental analysis calcd for C78H99NO12 (＋0.5H2O): C% 74.85, H% 8.05, N% 1.12, found: C% 74.64, H% 7.80, N% 0.88.
